# Supplementary material for: The electrochemical behavior of an aluminum alloy anode for rechargeable Al-ion batteries using an AlCl3–urea liquid electrolyte
Source: Royal Society of Chemistry journal article supplement (doi:10.1039/c7ra05860h), 2017-01-01
Supplement: c7ra05860h1.pdf [file c7ra05860h1.pdf]

## **Supporting Information**

### **The electrochemical behavior of aluminum alloy anode for rechargeable Al-ion batteries using an AlCl<sub>3</sub>-Urea liquid electrolyte**

Chen Wang, Junfeng Li, Handong Jiao, Jiguo Tu, Shuqiang Jiao\*

State Key Laboratory of Advanced Metallurgy, University of Science and Technology

Beijing, Beijing, 100083, PR China.

\* Corresponding author: sjiao@ustb.edu.cn (S Jiao)

Tel: +86-10-62333617, Fax: +86-10-62333617

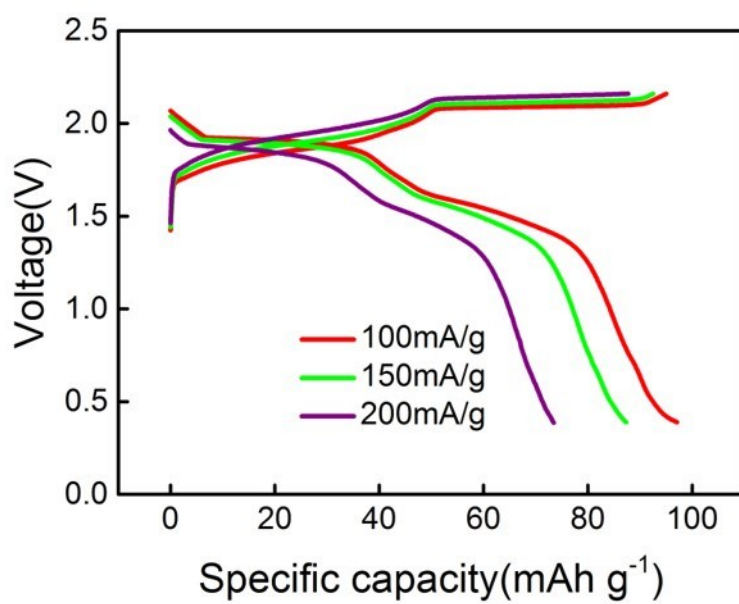

Fig. S1. Galvanostatic curves of Al alloy/PG cell with different current densities in an  $\text{AlCl}_3/\text{Urea} = 1.5$  (by mole) ionic liquid electrolyte.

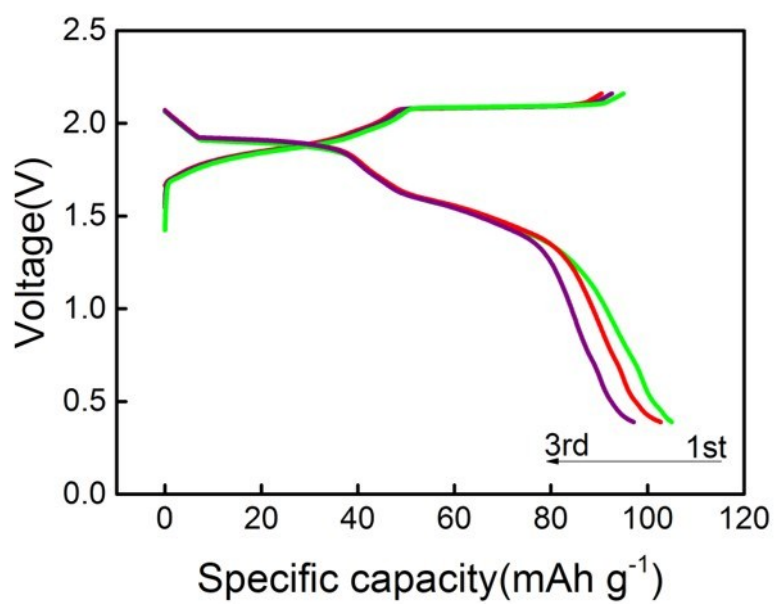

Fig. S2. Galvanostatic charge and discharge curves of an Al alloy/PG cell at a current density of 100 mA g<sup>-1</sup>.

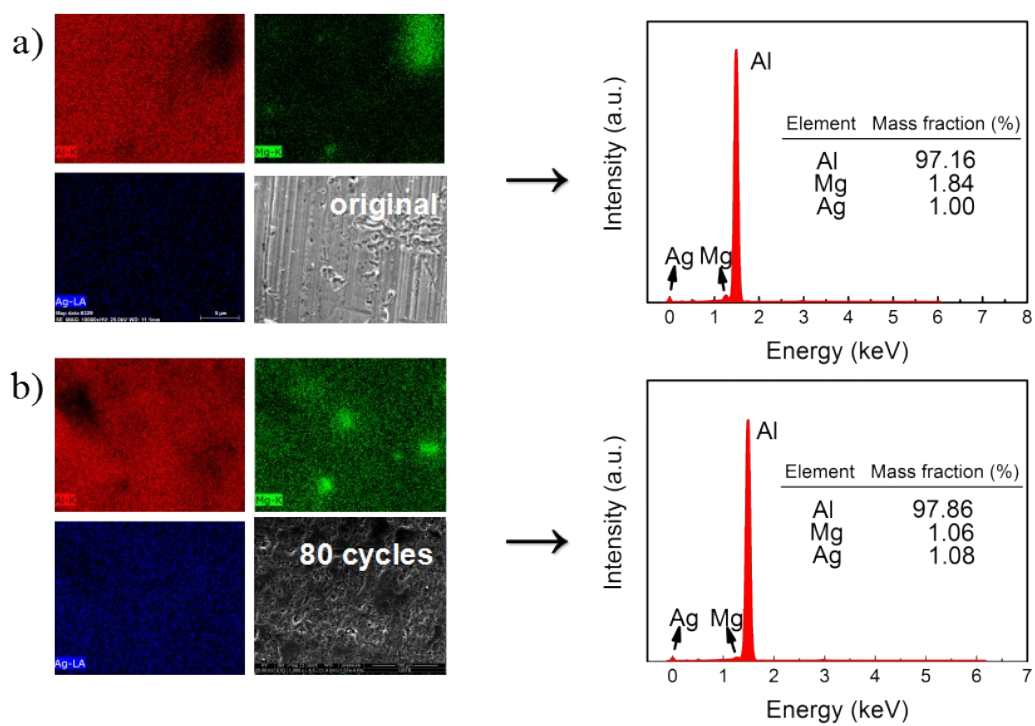

Fig. S3. a) The SEM and EDS images of the Al alloy before cycling, b) and after 80 cycles.

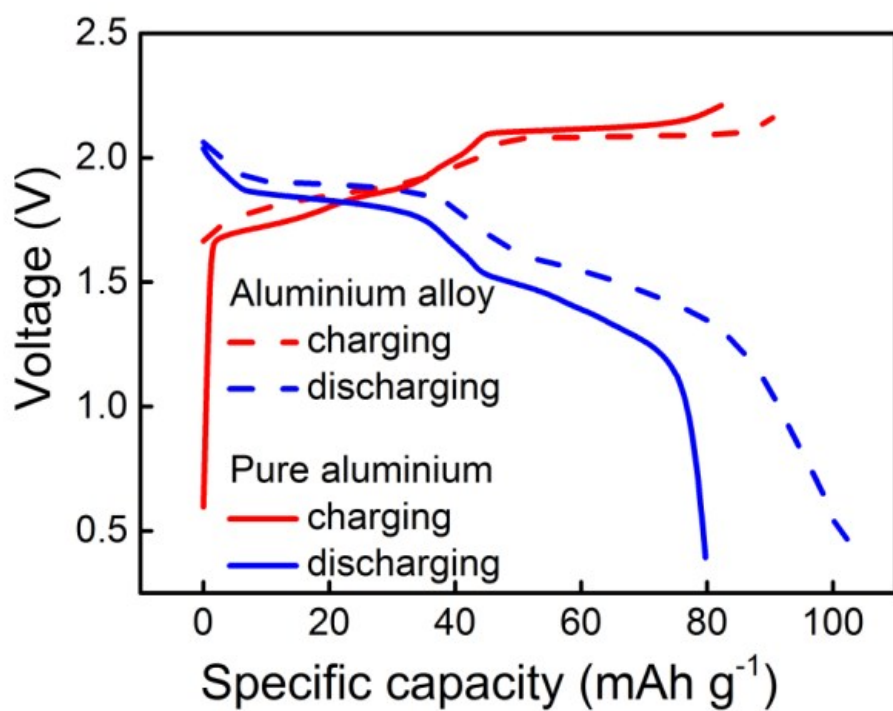

Fig. S4. Galvanostatic curves of Al alloy/PG and Al/PG cell in an  $\text{AlCl}_3/\text{Urea} = 1.5$  (by mole)

liquid electrolyte at a current density of  $100 \text{ mA g}^{-1}$ .

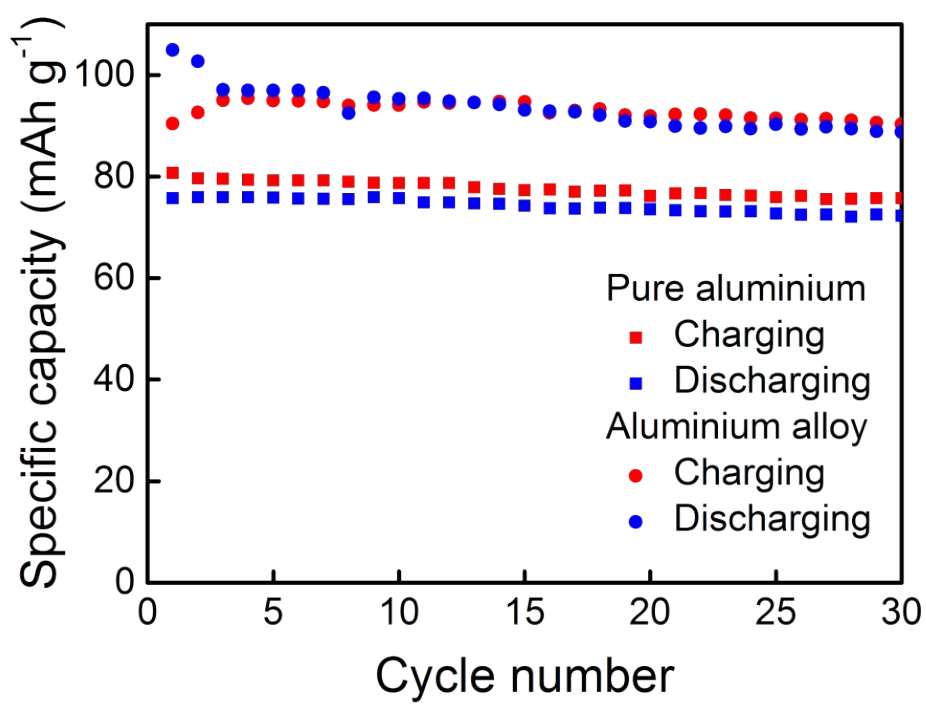

Fig. S5. The cycle stability of Al alloy/PG and Al/ PG cell at a current density of 100 mA g<sup>-1</sup>.
